# Supplementary material
Source: PubMed Central journal article supplement (PMC6867041)
Supplement: HBM-38-3025-s002.pdf [file HBM-38-3025-s002.pdf]

**Supplementary Table I. Effect sizes and observed power for select regions of interest**

| Brain Region                   | Talairach coordinates<br>x/y/z | Size<br>(3 mm <sup>3</sup><br>voxels) | Contrast                                     | Effect Size ( $\eta_p^2$ ) | Observed power |
|--------------------------------|--------------------------------|---------------------------------------|----------------------------------------------|----------------------------|----------------|
| <b>Subcortical areas</b>       |                                |                                       |                                              |                            |                |
| Thalamus                       | -11/-15/11                     | 43                                    | anxiety vs neutral ( <i>across groups</i> )  | 0.63                       | 0.98           |
|                                |                                |                                       | parametric ( <i>across groups</i> )          | <b>0.63</b>                | <b>0.98</b>    |
| Amygdala                       | -19/-5/-10                     | 18                                    | anxiety vs neutral ( <i>across groups</i> )  | 0.30                       | 0.51           |
|                                |                                |                                       | parametric ( <i>across groups</i> )          | <b>0.73</b>                | <b>0.99</b>    |
| <b>Medial/temporal areas</b>   |                                |                                       |                                              |                            |                |
| Mid Insula                     | 41/5/6                         | 44                                    | anxiety vs neutral ( <i>spider phobics</i> ) | 0.39                       | 0.38           |
|                                |                                |                                       | parametric ( <i>spider phobics</i> )         | <b>0.80</b>                | <b>0.98</b>    |
| Dorsal Anterior Cingulate      | -4/7/35                        | 67                                    | anxiety vs neutral ( <i>spider phobics</i> ) | <b>0.72</b>                | <b>0.90</b>    |
|                                |                                |                                       | parametric ( <i>spider phobics</i> )         | <b>0.72</b>                | <b>0.90</b>    |
| <b>Prefrontal areas</b>        |                                |                                       |                                              |                            |                |
| Dorsolateral prefrontal cortex | -42/24/27                      | 36                                    | anxiety vs neutral ( <i>spider phobics</i> ) | <b>0.79</b>                | <b>0.97</b>    |
|                                |                                |                                       | parametric ( <i>spider phobics</i> )         | 0.18                       | 0.16           |

Effect sizes and observed power for the 2<sup>nd</sup> level effects (group level) are presented. Effect sizes were estimated using partial eta squared ( $\eta_p^2$ ), which describes the proportion of the total variability in the dependent variable attributable to an effect. Effect sizes > 0.60 are in bold font. The reported observed power is the statistical power based on the observed effect size (computed with alpha = 0.05). For subcortical and medial/temporal areas, this analysis was performed on the signal extracted only from voxels which showed a significant effect in both analyses, for the dorsolateral prefrontal cortex the extent of the region could be solely defined based on the categorical analysis.
